# Supplementary material
Source: PubMed Central journal article supplement (PMC9286312)
Supplement: ci1c01061_si_002.pdf [file ci1c01061_si_002.pdf]

## Supporting Information

### **Modeling the Structure-Activity-Relationship of Arbidol Derivatives and other SARS-CoV-2 Fusion Inhibitors Targeting the S2 Segment of the Spike Protein.**

Matthew R. Freidel,<sup>1</sup> and Roger S. Armen<sup>1\*</sup>

<sup>1</sup>Department of Pharmaceutical Sciences, College of Pharmacy, Thomas Jefferson University,  
901 Walnut St. Suite 918, Philadelphia, Pennsylvania, 19170.

\*Corresponding author, E-mail: [roger.armen@jefferson.edu](mailto:roger.armen@jefferson.edu)

**Table S1.** Virtual screening data for ARB derivatives. Compounds are ranked by predicted free energy of binding ( $\Delta G_{\text{bind}}$ ) in (kcal/mol). Predicted physiochemical properties of molecular weight (MW) and cLogP are also provided along with Smiles strings describing the 2D structure of each small-molecule derivative.

|    | $\Delta G$ | MW    | cLogP | Smiles                                                                                             |
|----|------------|-------|-------|----------------------------------------------------------------------------------------------------|
| 1  | -9.89      | 633.6 | 7.3   | <chem>CCOC(=O)C1=C(C)N(CC2=CC=CC=C2)C2=CC(Br)=C(O)C(CN3CCC(CC3)(C(=O)OCC)C3=CC=CC=C3)=C12</chem>   |
| 2  | -9.88      | 633.6 | 7.7   | <chem>CCOC(=O)C1=C(C)N(C2=CC(Br)=C(O)C(CN3CCC(CC3)(C(=O)OCC)C3=CC=CC=C3)=C12)C1=CC=CC(C)=C1</chem> |
| 3  | -9.19      | 604.8 | 3.9   | <chem>CCOC(=O)C1=C(CSC2=CC=CC=C2)N(C)C2=C1C(CN1CCN(CCOCCO)CC1)=C(O)C(=C2)C1=CN=CC=C1</chem>        |
| 4  | -8.19      | 605.6 | 6.8   | <chem>CCOC(=O)C1=C(CN2CCN(CC2)C2=CC=CC=C2)N(C2=CC(Br)=C(O)C(CN(C)C)=C12)C1=CC=CC=C1</chem>         |
| 5  | -7.87      | 513.6 | 6.3   | <chem>CCOC(=O)C1=C(C)N(C2=C1C(CN1CCN(CC1)C1=CC=C(C)C=C1)=C(O)C(=C2)C1=CC=C(OC)C=C1</chem>          |
| 6  | -7.82      | 501.4 | 5.4   | <chem>CCOC(=O)C1=C(COC2=CC=CC=C2)N(C)C2=CC(Br)=C(O)C(CN3CCCCC3)=C12</chem>                         |
| 7  | -7.80      | 573.9 | 7.3   | <chem>CCOC(=O)C1=C(CSC2=CC=CC=C2)N(C2=CC(Br)=C(O)C(CN(C)C)=C12)C1=CC=C(C)C=C1</chem>               |
| 8  | -7.75      | 641.4 | 7.9   | <chem>CCOC(=O)C1=C(C)N(C2=CC(Br)=C(O)C(CN3CCN(CC3)C3=CC=CC=C3)=C12)C1=CC(Br)=CC=C1</chem>          |
| 9  | -7.65      | 553.5 | 6.8   | <chem>CCOC(=O)C1=C(CSC2=CC=CC=C2)N(CC2=CC=CC=C2)C2=CC(Br)=C(O)C(CN(C)C)=C12</chem>                 |
| 10 | -7.49      | 582.3 | 5.1   | <chem>CCOC(=O)C1=C(COC2=CC=C(Br)C=C2)N(C)C2=CC(Br)=C(O)C(CN3CCOCC3)=C12</chem>                     |
| 11 | -7.46      | 521.5 | 5.3   | <chem>CCOC(=O)C1=C(CSC2=CC=C(OCC)C=C2)N(C)C2=CC(Br)=C(O)C(CN(C)C)=C12</chem>                       |
| 12 | -7.41      | 428.5 | 5.6   | <chem>CCOC(=O)C1=C(N(CC2=CC=CC=C2)C2=C1C(CN(C)C)=C(O)C(=C2)C1=CC=CC=C1</chem>                      |
| 13 | -7.38      | 424.5 | 3.8   | <chem>CCOC(=O)C1=C(C)N(C2=C1C(CN1CCOCC1)=C(O)C(=C2)C1=CC=C(OC)C=C1</chem>                          |
| 14 | -7.35      | 602.6 | 3.9   | <chem>CCOC(=O)C1=C(CN2CCN(CC#N)CC2)N(C2CCCCC2)C2=CC(Br)=C(O)C(CN3CCOCC3)=C12</chem>                |
| 15 | -7.35      | 606.6 | 4.2   | <chem>CCOC(=O)C1=C(CSC2=CC=CC=C2)N(C)C2=CC(Br)=C(O)C(CN3CCN(CCOCCO)CC3)=C12</chem>                 |
| 16 | -7.33      | 509.4 | 3.7   | <chem>CCOC(=O)C1=C(CS(=O)(=O)C2=CC=CC=C2)N(C)C2=CC(Br)=C(O)C(CN(C)C)=C12</chem>                    |
| 17 | -7.24      | 556.5 | 5.2   | <chem>CCOC(=O)C1=C(CN2CCCCN2)N(C2=CC(Br)=C(O)C(CN3CCOCC3)=C12)C1=CC=CC=C1</chem>                   |
| 18 | -7.22      | 471.4 | 5.8   | <chem>CCOC(=O)C1=C(C)N(C2=CC(Br)=C(O)C(CN3CCCCC3)=C12)C1=CC=CC=C1</chem>                           |
| 19 | -7.18      | 531.5 | 5.0   | <chem>CCOC(=O)C1=C(CSC2=C(C#N)C(C)=CC(C)=N2)N(C)C2=CC(Br)=C(O)C(CN(C)C)=C12</chem>                 |
| 20 | -7.16      | 461.4 | 4.6   | <chem>CCOC(=O)C1=C(COC2=CC=CC=C2)N(C)C2=CC(Br)=C(O)C(CN(C)C)=C12</chem>                            |
| 21 | -7.11      | 548.5 | 4.9   | <chem>CCOC(=O)C1=C(CN2CCCCN2)N(C2CCCCC2)C2=CC(Br)=C(O)C(CN3CCOCC3)=C12</chem>                      |
| 22 | -7.10      | 543.9 | 4.3   | <chem>CCOC(=O)C1=C(CS(=O)(=O)C2=CC=C(Cl)C=C2)N(C)C2=CC(Br)=C(O)C(CN(C)C)=C12</chem>                |
| 23 | -7.10      | 446.6 | 5.4   | <chem>CCOC(=O)C1=C(CSC2=CC=CC=C2)N(C)C2=C1C1=C(OCN(C)C1)C1=CC=CC=C21</chem>                        |
| 24 | -7.06      | 485.4 | 5.5   | <chem>CCOC(=O)C1=C(C)N(CC2=CC=CC=C2)C2=CC(Br)=C(O)C(CN3CCCCC3)=C12</chem>                          |
| 25 | -7.04      | 491.4 | 5.6   | <chem>CCOC(=O)C1=C(CSC2=CC=C(C)C=C2)N(C)C2=CC(Br)=C(O)C(CN(C)C)=C12</chem>                         |
| 26 | -7.03      | 491.4 | 4.4   | <chem>CCOC(=O)C1=C(COC2=CC=C(OC)C=C2)N(C)C2=CC(Br)=C(O)C(CN(C)C)=C12</chem>                        |
| 27 | -6.99      | 477.4 | 5.1   | <chem>CCOC(=O)C1=C(CSC2=CC=CC=C2)N(C)C2=CC(Br)=C(O)C(CN(C)C)=C12</chem>                            |
| 28 | -6.97      | 545.5 | 6.8   | <chem>CCOC(=O)C1=C(CSC2=CC=CC=C2)N(C2CCCCC2)C2=CC(Br)=C(O)C(CN(C)C)=C12</chem>                     |
| 29 | -6.95      | 440.6 | 4.1   | <chem>CCOC(=O)C1=C(CSC2=CC=CC=C2)N(C)C2=C1C(CN1CCOCC1)=C(O)C=C2</chem>                             |
| 30 | -6.90      | 390.4 | 1.9   | <chem>CCOC(=O)C1=C(C)N(CC(=O)OC)C2=C1C(CN1CCOCC1)=C(O)C=C2</chem>                                  |
| 31 | -6.87      | 514.5 | 5.4   | <chem>CCOC(=O)C1=C(CN2CCCCC2)N(C2=CC(Br)=C(O)C(CN(C)C)=C12)C1=CC=CC=C1</chem>                      |
| 32 | -6.83      | 539.5 | 6.7   | <chem>CCOC(=O)C1=C(CSC2=CC=CC=C2)N(C2=CC(Br)=C(O)C(CN(C)C)=C12)C1=CC=CC=C1</chem>                  |
| 33 | -6.83      | 596.5 | 3.8   | <chem>CCOC(=O)C1=C(CN2CCN(CC#N)CC2)N(C2=CC(Br)=C(O)C(CN3CCOCC3)=C12)C1=CC=CC=C1</chem>             |
| 34 | -6.81      | 437.4 | 5.0   | <chem>CCCCN1C(C)=C(C(=O)OCC)C2=C(CN3CCCC3)C(O)=C(Br)C=C12</chem>                                   |
| 35 | -6.81      | 437.5 | 3.8   | <chem>CCOC(=O)C1=C(C)N(C2=C1C(CN1CCN(C)CC1)=C(O)C=C2)C1=CC=C(OC)C=C1</chem>                        |

|    |       |       |     |                                                                    |
|----|-------|-------|-----|--------------------------------------------------------------------|
| 36 | -6.80 | 473.4 | 4.7 | CCOC(=O)C1=C(C)N(C2=CC(Br)=C(O)C(CN3CCOCC3)=C12)C1=CC=CC=C1        |
| 37 | -6.76 | 358.4 | 4.2 | CCCCN1C(C)=C(C(=O)OCC)C2=C1C=CC(O)=C2CN1CCCC1                      |
| 38 | -6.74 | 487.4 | 5.2 | CCOC(=O)C1=C(C)N(C2=CC(Br)=C(O)C(CN3CCCC3)=C12)C1=CC=C(OC)C=C1     |
| 39 | -6.73 | 516.4 | 4.4 | CCOC(=O)C1=C(CN2CCOCC2)N(C2=CC(Br)=C(O)C(CN(C)C)=C12)C1=CC=CC=C1   |
| 40 | -6.72 | 374.5 | 3.6 | CCCCN1C(C)=C(C(=O)OCC)C2=C1C=CC(O)=C2CN1CCOCC1                     |
| 41 | -6.72 | 474.6 | 6.0 | CCOC(=O)C1=C(CSC2=CC=CC=C2)N(CC2=CC=CC=C2)C2=C1C(CN(C)C)=C(O)C=C2  |
| 42 | -6.65 | 477.4 | 5.1 | CCOC(=O)C1=C(CSC2=CC=CC=C2)N(C)C2=CC(O)=C(Br)C(CN(C)C)=C12         |
| 43 | -6.65 | 434.5 | 3.1 | CCOC(=O)C1=C(CN2CCCC2)N(C)C2=C1C1=C(OCN(C)C1)C(=C2)C1=CN=CC=C1     |
| 44 | -6.61 | 500.4 | 5.0 | CCOC(=O)C1=C(CN2CCCC2)N(C2=CC(Br)=C(O)C(CN(C)C)=C12)C1=CC=CC=C1    |
| 45 | -6.60 | 398.5 | 4.3 | CCOC(=O)C1=C(CSC2=CC=CC=C2)N(C)C2=C1C(CN(C)C)=C(O)C=C2             |
| 46 | -6.57 | 504.4 | 5.2 | CCOC(=O)C1=C(CN2CCCC2)N(C2CCCC2)C2=CC(Br)=C3OCN(C)CC3=C12          |
| 47 | -6.50 | 372.5 | 4.7 | CCCCN1C(C)=C(C(=O)OCC)C2=C1C=CC(O)=C2CN1CCCC1                      |
| 48 | -6.46 | 511.9 | 5.7 | CCOC(=O)C1=C(CSC2=CC=C(Cl)C=C2)N(C)C2=CC(Br)=C(O)C(CN(C)C)=C12     |
| 49 | -6.45 | 428.9 | 4.5 | CCOC(=O)C1=C(C)N(C2=C1C(CN1CCOCC1)=C(O)C=C2)C1=CC=C(Cl)C=C1        |
| 50 | -6.40 | 453.4 | 4.4 | CCCCN1C(C)=C(C(=O)OCC)C2=C(CN3CCOCC3)C(O)=C(Br)C=C12               |
| 51 | -6.39 | 562.5 | 4.2 | CCOC(=O)C1=C(CSC2=CC=CC=C2)N(C)C2=CC(Br)=C(O)C(CN3CCN(CCO)CC3)=C12 |
| 52 | -6.37 | 506.5 | 5.1 | CCOC(=O)C1=C(CN2CCCC2)N(C2CCCC2)C2=CC(Br)=C(O)C(CN(C)C)=C12        |
| 53 | -6.32 | 348.4 | 2.1 | CCOC(=O)C1=C(C)N(CC(=O)OC)C2=C1C(CN(C)C)=C(O)C=C2                  |
| 54 | -6.30 | 387.5 | 3.7 | CCCCN1C(C)=C(C(=O)OCC)C2=C1C=CC(O)=C2CN1CCN(C)CC1                  |
| 55 | -6.30 | 423.5 | 4.5 | CCOC(=O)C1=C(CN(CC)CC)N(C2=C1C(CN(C)C)=C(O)C=C2)C1=CC=CC=C1        |
| 56 | -6.29 | 394.5 | 3.9 | CCOC(=O)C1=C(C)N(C2=C1C(CN1CCOCC1)=C(O)C=C2)C1=CC=CC=C1            |
| 57 | -6.22 | 426.5 | 6.0 | CCOC(=O)C1=C(C)N(C2=C1C1=C(OCN(CC3=CC=CC=C3)C1)C=C2)C1=CC=CC=C1    |
| 58 | -6.15 | 454.4 | 2.7 | CCOC(=O)C1=C(CN2CCOCC2)N(C)C2=CC(Br)=C(O)C(CN(C)C)=C12             |
| 59 | -6.13 | 452.4 | 3.8 | CCOC(=O)C1=C(CN2CCCC2)N(C)C2=CC(Br)=C(O)C(CN(C)C)=C12              |
| 60 | -6.02 | 382.4 | 4.0 | CCOC(=O)C1=C(C)N(C2=C1C(CN(C)C)=C(O)C=C2)C1=CC=C(OC)C=C1           |
| 61 | -6.00 | 364.4 | 4.3 | CCOC(=O)C1=C(C)N(C)C2=C1C1=C(OCN(CC3=CC=CC=C3)C1)C=C2              |
| 62 | -5.92 | 483.4 | 4.9 | CCOC(=O)C1=C(CSC2=CSC=C2)N(C)C2=CC(Br)=C(O)C(CN(C)C)=C12           |
| 63 | -5.77 | 381.4 | 2.0 | CCOC(=O)C1=C(CO)N(C)C2=C1C1=C(OCN(C)C1)C(=C2)C1=CN=CC=C1           |
| 64 | -5.75 | 330.4 | 3.3 | CCOC(=O)C1=C(C)N(C)C2=C1C(CN1CCCC1)=C(O)C=C2                       |
| 65 | -5.71 | 460.6 | 6.0 | CCOC(=O)C1=C(CSC2=CC=CC=C2)N(C2=C1C(CN(C)C)=C(O)C=C2)C1=CC=CC=C1   |
| 66 | -5.70 | 347.4 | 2.4 | CCOC(=O)C1=C(C)N(C)C2=C1C(CN(C)C)=C(O)C(CN(C)C)=C2                 |
| 67 | -5.68 | 474.4 | 4.6 | CCOC(=O)C1=C(CN(C)C)N(C2=CC(Br)=C(O)C(CN(C)C)=C12)C1=CC=CC=C1      |
| 68 | -5.67 | 369.3 | 3.3 | CCOC(=O)C1=C(C)N(C)C2=CC(Br)=C(O)C(CN(C)C)=C12                     |
| 69 | -5.67 | 483.4 | 5.0 | CCOC(=O)C1=C(CSC2=CC=CS2)N(C)C2=CC(Br)=C(O)C(CN(C)C)=C12           |
| 70 | -5.62 | 290.4 | 2.5 | CCOC(=O)C1=C(C)N(C)C2=C1C(CN(C)C)=C(O)C=C2                         |
| 71 | -5.62 | 412.3 | 2.9 | CCOC(=O)C1=C(CN(C)C)N(C)C2=CC(Br)=C(O)C(CN(C)C)=C12                |
| 72 | -5.61 | 344.5 | 3.6 | CCOC(=O)C1=C(C)N(C)C2=C1C(CN1CCC(C)CC1)=C(O)C=C2                   |
| 73 | -5.61 | 453.6 | 4.2 | CCOC(=O)C1=C(CSC2=CC=CC=C2)N(C)C2=C1C(CN1CCN(C)CC1)=C(O)C=C2       |
| 74 | -5.57 | 318.4 | 3.2 | CCOC(=O)C1=C(C)N(C)C2=C1C(CN(CC)CC)=C(O)C=C2                       |
| 75 | -5.44 | 352.4 | 4.2 | CCOC(=O)C1=C(C)N(C2=C1C(CN(C)C)=C(O)C=C2)C1=CC=CC=C1               |

|    |       |       |     |                                                                      |
|----|-------|-------|-----|----------------------------------------------------------------------|
| 76 | -5.43 | 366.5 | 4.7 | <chem>CCOC(=O)C1=C(C)N(C2=C1C(CN(C)C)=C(O)C=C2)C1=CC=C(C)C=C1</chem> |
| 77 | -5.35 | 366.5 | 4.2 | <chem>CCOC(=O)C1=C(C)N(CC2=CC=CC=C2)C2=C1C(CN(C)C)=C(O)C=C2</chem>   |
| 78 | -4.77 | 315.4 | 2.4 | <chem>CCOC(=O)C1=C(C)N(C)C2=C1C(CN(C)C)=C(O)C(=C2)C#N</chem>         |
| 79 | -4.65 | 345.4 | 2.3 | <chem>CCOC(=O)C1=C(C)N(C)C2=C1C(CN1CCN(C)CC1)=C(O)C=C2</chem>        |

**Table S2.** Cross-Validation datasets randomly generated using a “leave 4 out” strategy.

|            | Remove for Validation Set (data #) |
|------------|------------------------------------|
| dataset 1  | Remove: 1, 2, 5, 6                 |
| dataset 2  | Remove: 2, 10, 11, 14              |
| dataset 3  | Remove: 3, 8, 11, 13               |
| dataset 4  | Remove: 1, 4, 5, 10                |
| dataset 5  | Remove: 1, 3, 5, 13                |
| dataset 6  | Remove: 6, 9, 12, 14               |
| dataset 7  | Remove: 2, 3, 7, 13                |
| dataset 8  | Remove: 3, 8, 9, 10                |
| dataset 9  | Remove: 4, 8, 9, 12                |
| dataset 10 | Remove: 5, 6, 10, 12               |
| dataset 11 | Remove: 4, 6, 7, 11                |
| dataset 12 | Remove: 7, 9, 11, 12               |
| dataset 13 | Remove: 2, 7, 13, 14               |
| dataset 14 | Remove: 1, 4, 8, 14                |

**Table S3.** Cross-Validation data for linear correlation analysis of OA saponin derivatives predicted free energy of binding ( $\Delta G_{\text{bind}}$ ) at Site 1 and Site 2 compared to experiment.

|           | Site 1 (Test Set)  |       |                | Site 1 (Validation Set) |       |                |
|-----------|--------------------|-------|----------------|-------------------------|-------|----------------|
|           | RMSE<br>(kcal/mol) | R     | R <sup>2</sup> | RMSE<br>(kcal/mol)      | R     | R <sup>2</sup> |
| dataset 1 | 0.94               | 0.629 | 0.395          | 1.52                    | 0.576 | 0.332          |
| dataset 2 | 0.95               | 0.606 | 0.368          | 1.51                    | 0.595 | 0.354          |
| dataset 3 | 0.96               | 0.685 | 0.470          | 1.46                    | 0.545 | 0.297          |
| dataset 4 | 0.91               | 0.624 | 0.389          | 1.63                    | 0.980 | 0.959          |
| dataset 5 | 0.93               | 0.669 | 0.447          | 1.59                    | 0.691 | 0.477          |
| dataset 6 | 0.96               | 0.463 | 0.214          | 1.47                    | 0.904 | 0.817          |

|            |      |       |       |      |       |       |
|------------|------|-------|-------|------|-------|-------|
| dataset 7  | 0.96 | 0.744 | 0.553 | 1.44 | 0.075 | 0.006 |
| dataset 8  | 0.96 | 0.631 | 0.399 | 1.46 | 0.883 | 0.780 |
| dataset 9  | 0.96 | 0.500 | 0.250 | 1.47 | 0.824 | 0.680 |
| dataset 10 | 0.93 | 0.429 | 0.184 | 1.55 | 0.761 | 0.580 |
| dataset 11 | 0.96 | 0.683 | 0.467 | 1.43 | 0.475 | 0.226 |
| dataset 12 | 0.96 | 0.508 | 0.258 | 1.43 | 0.898 | 0.807 |
| dataset 13 | 0.95 | 0.695 | 0.483 | 1.50 | 0.175 | 0.031 |
| dataset 14 | 0.94 | 0.601 | 0.361 | 1.52 | 0.266 | 0.071 |
| Average    | 0.95 | 0.605 | 0.374 | 1.50 | 0.618 | 0.458 |
| Stdev      | 0.02 | 0.095 | 0.111 | 0.06 | 0.287 | 0.318 |

|            | Site 2 (Test Set)  |        |                | Site 2 (Validation Set) |        |                |
|------------|--------------------|--------|----------------|-------------------------|--------|----------------|
|            | RMSE<br>(kcal/mol) | R      | R <sup>2</sup> | RMSE<br>(kcal/mol)      | R      | R <sup>2</sup> |
| dataset 1  | 0.38               | -0.162 | 0.026          | 0.57                    | -0.754 | 0.568          |
| dataset 2  | 0.36               | -0.312 | 0.098          | 0.63                    | -0.361 | 0.130          |
| dataset 3  | 0.36               | -0.385 | 0.148          | 0.63                    | -0.033 | 0.001          |
| dataset 4  | 0.35               | -0.186 | 0.034          | 0.68                    | -0.590 | 0.348          |
| dataset 5  | 0.31               | -0.123 | 0.015          | 0.79                    | -0.566 | 0.320          |
| dataset 6  | 0.38               | -0.478 | 0.229          | 0.55                    | -0.055 | 0.003          |
| dataset 7  | 0.37               | -0.263 | 0.069          | 0.61                    | -0.687 | 0.471          |
| dataset 8  | 0.34               | -0.468 | 0.219          | 0.70                    | -0.704 | 0.496          |
| dataset 9  | 0.41               | -0.498 | 0.248          | 0.38                    | 0.461  | 0.213          |
| dataset 10 | 0.41               | -0.622 | 0.387          | 0.39                    | 0.503  | 0.253          |
| dataset 11 | 0.42               | -0.284 | 0.081          | 0.36                    | -0.139 | 0.019          |
| dataset 12 | 0.43               | -0.513 | 0.264          | 0.28                    | -0.257 | 0.066          |
| dataset 13 | 0.38               | -0.096 | 0.009          | 0.56                    | -0.803 | 0.644          |
| dataset 14 | 0.29               | 0.043  | 0.002          | 0.82                    | -0.845 | 0.713          |
| Average    | 0.37               | -0.311 | 0.131          | 0.57                    | -0.345 | 0.303          |
| Stdev      | 0.04               | 0.192  | 0.120          | 0.16                    | 0.446  | 0.245          |
